# Supplementary material for: Au-Nanorods Supporting Pd and Pt Nanocatalysts for the Hydrogen Evolution Reaction: Pd Is Revealed to Be a Better Catalyst than Pt
Source: MDPI journal article supplement (doi:10.3390/nano13132007), 2023-07-05
Supplement: s1 [file s1]

## Supplementary Information

### **Au-Nanorods Supporting Pd and Pt Nanocatalysts for the Hydrogen Evolution Reaction: Pd Is Revealed to Be a Better Catalyst Than Pt**

Ayoub Laghrissi <sup>1</sup> and Mohammed Es-Souni <sup>2,\*</sup>

1        Currently with the Technical Faculty, Mads Clausen Institute, University of Southern Denmark, 6400 Sonderborg, Denmark; laghrissi@mci.sdu.dk

2        Formerly with Kiel University of Applied Sciences, Grenzstrasse 3, D-24149 Kiel, Germany

\*        Correspondence: mohammed.es-souni@fh-kiel.de

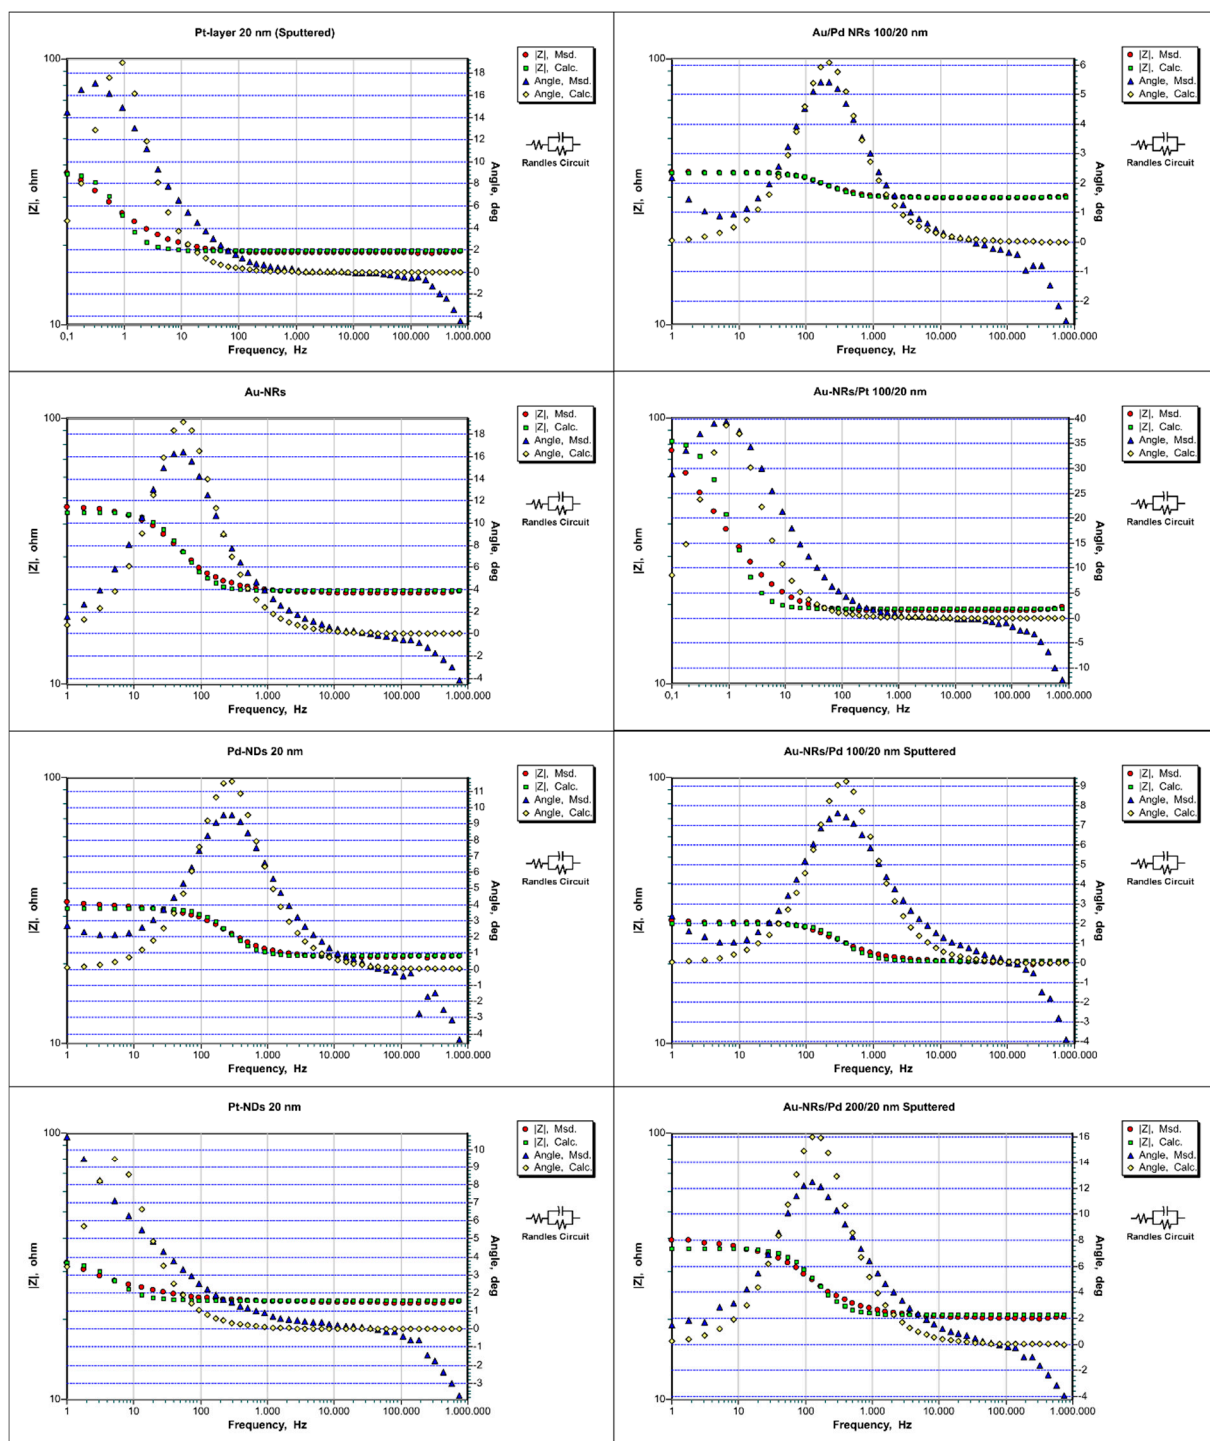

**Figure. S1:** Measured and fitted Electrochemical impedance spectroscopy (EIS) results for all synthesized nanostructures.

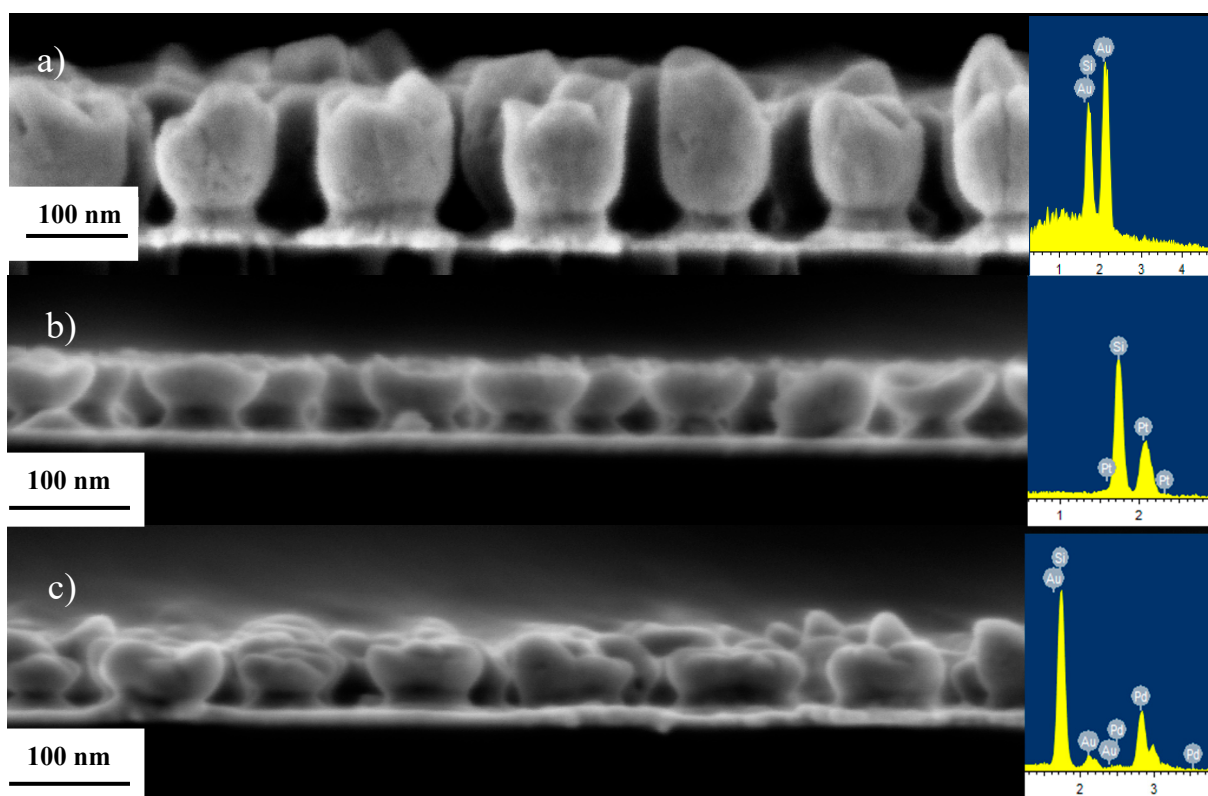

**Figure. S2** SEM micrographs and EDS spectra for monolithic structures: (a) Au-NRs; (b) Pt-NDs; (c) Pd-NDs.

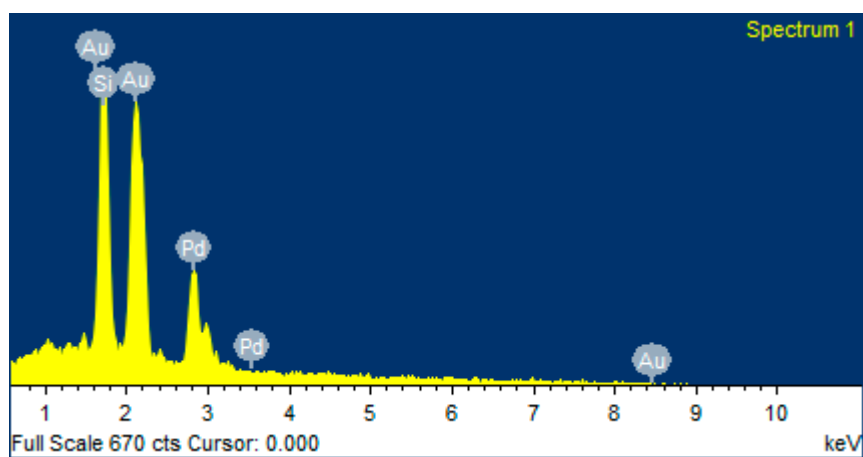

**Figure. S3** EDS spectrum of Au-NRs/Pd (sputtered) 100/20 nm after the electrochemical measurements.
